# Supplementary material for: Phosphoserine Phosphatase Promotes Lung Cancer Progression through the Dephosphorylation of IRS-1 and a Noncanonical L-Serine-Independent Pathway
Source: PubMed Central journal article supplement — Mol Cells. 2019 Aug 19;42(8):604–16. doi: 10.14348/molcells.2019.0160 (PMC6715339; doi:10.14348/molcells.2019.0160), 2019-08-19
Supplement: molce-42-604_supple.pdf [file molce-42-604_supple.pdf]

TCGA LUSC  
p= 0.03306

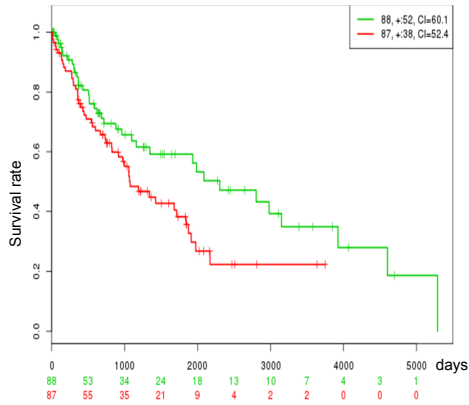

TCGA LUAD  
p= 0.02186

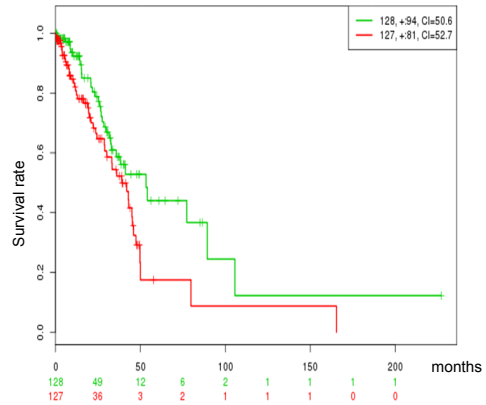

Kerby Shedden et al. 2008  
p= 0.001137

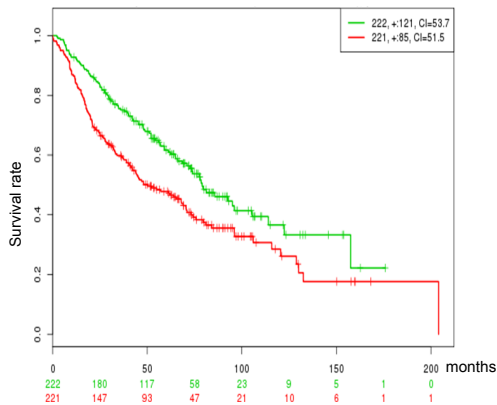

Dhananjay Chitale et al. 2009  
p= 0.0001199

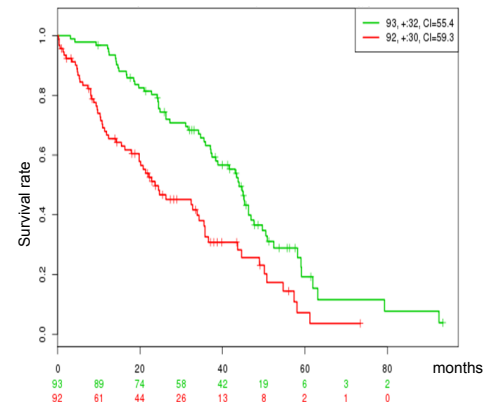

Tomida et al. 2009  
p = 0.03  
Asian (Japanese) population

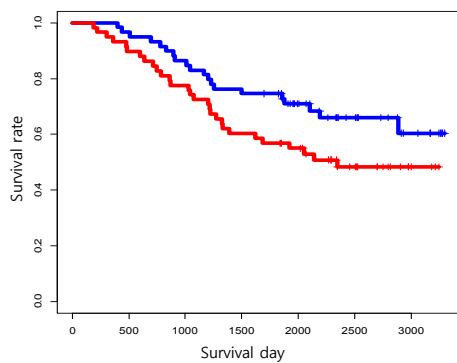

Lee et al. 2008  
p = 0.05  
Asian (Korean) population

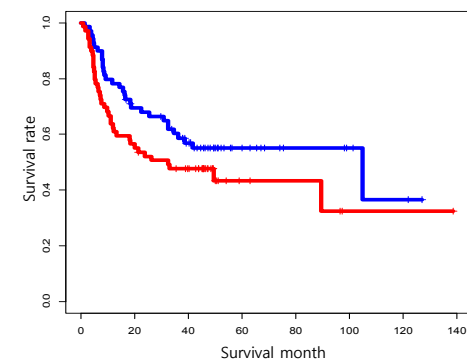

Supplementary Fig. S1. Prognoses of two groups of lung cancer patients classified by PSPH expression (SurvExpress).

A549

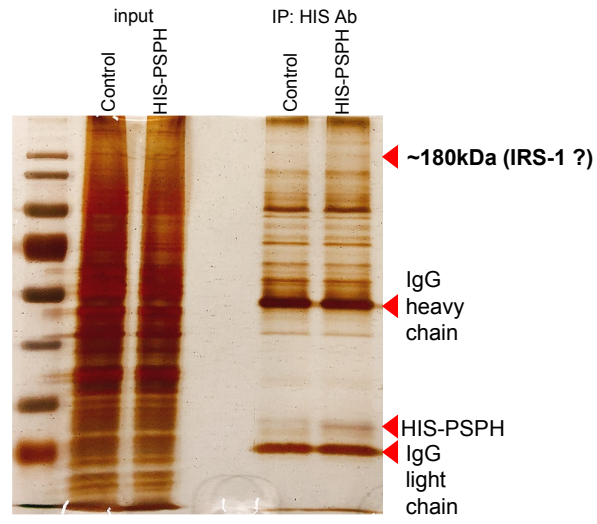

NCI-H1299

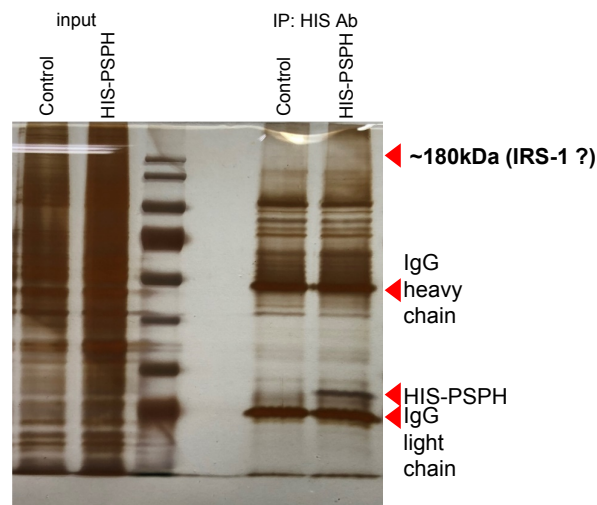

Supplementary Fig. S2. Silver-stained image of SDS-PAGE using PSPH IP samples.

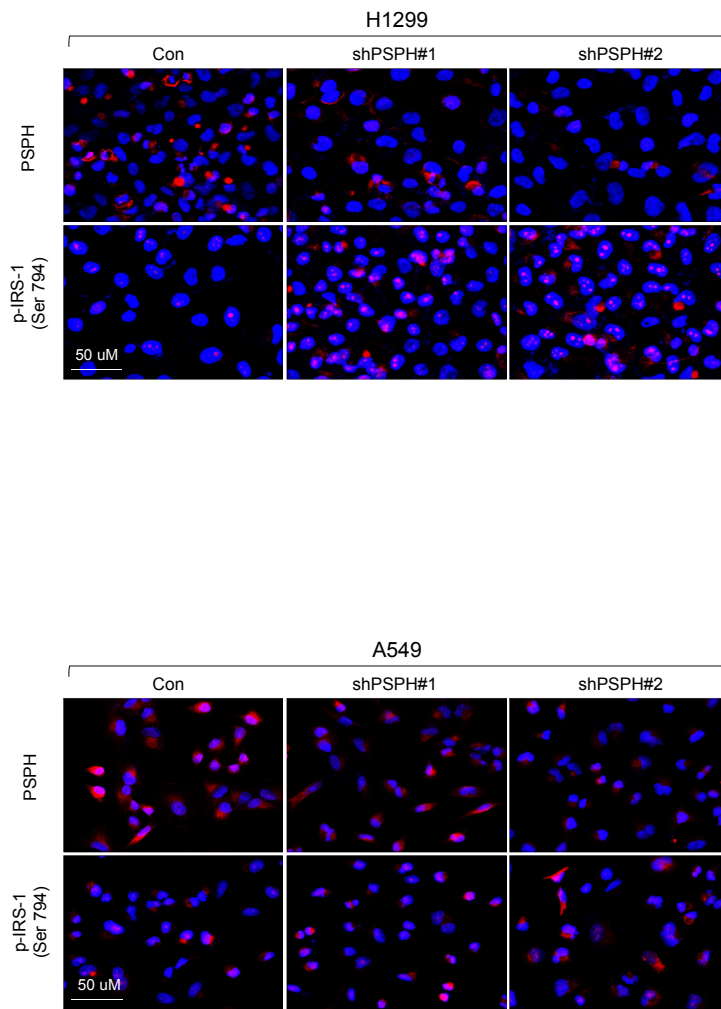

**Supplementary Fig. S3. Validation of IRS-1 dephosphorylation by PSPH knockdown (immunostaining).** Red, phospho-IRS-1 (Ser794); Blue, DAPI.

### GSE30219

CDK1  
R = 0.459525  
p = 1.92E-17

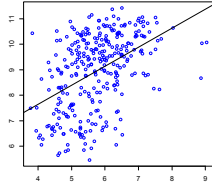

CDK2  
R = 0.38093  
p = 3.63E-08

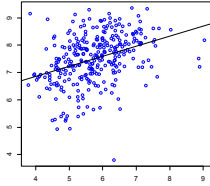

CDK4  
R = 0.410599  
p = 6.47E-14

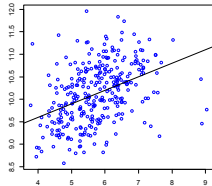

DDIT3  
R = 0.378739  
p = 6.58E-12

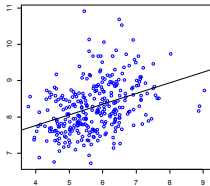

EIF4E  
R = 0.207446  
p = 0.000252

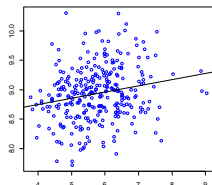

GSK3B  
R = 0.230147  
p = 4.68E-05

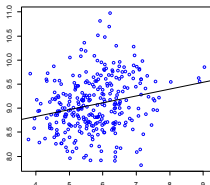

HRAS  
R = 0.362531  
p = 5.74E-11

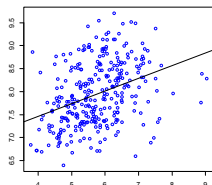

IRAK4  
R = 0.258831  
p = 4.32E-06

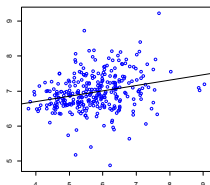

### GSE37745

CDK1  
R = 0.459525  
p = 1.92E-17

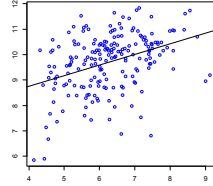

CDK2  
R = 0.38093  
p = 3.63E-08

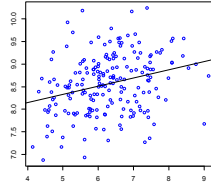

CDK4  
R = 0.266284  
p = 0.000162

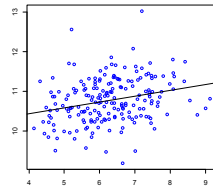

DDIT3  
R = 0.271391  
p = 0.000119

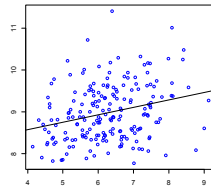

EIF4E  
R = 0.346076  
p = 6.75E-07

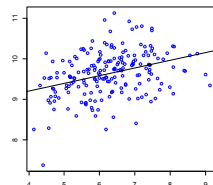

GSK3B  
R = 0.252963  
p = 0.000347

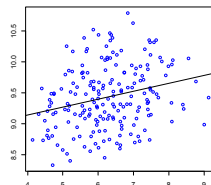

HRAS  
R = 0.235428  
p = 0.000895

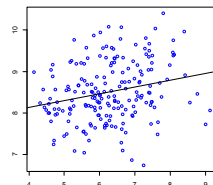

IRAK4  
R = 0.258112  
p = 0.00026

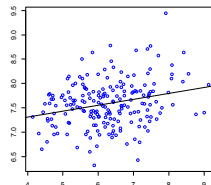

Supplementary Fig. S4. The correlation between PSPH expression and Akt target genes.

GSE30219

MAPK1  
R = 0.290382  
p = 2.23E-07

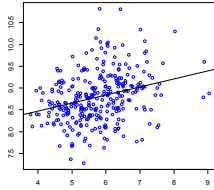

MAPKAP1  
R = 0.307215  
p = 3.92E-08

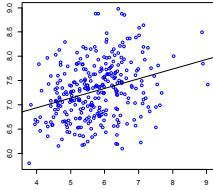

NCK1  
R = 0.258926  
p = 4.29E-06

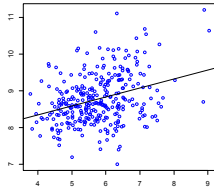

PDK1  
R = 0.453816  
p = 5.30E-17

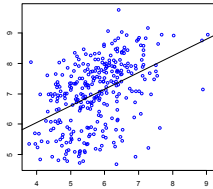

RAC1  
R = 0.21669  
p = 0.00013

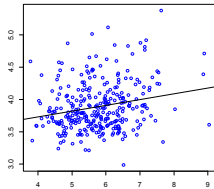

RIT1  
R = 0.219812  
p = 0.000103

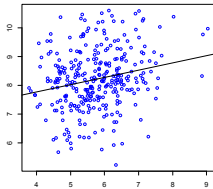

SLC2A1  
R = 0.415064  
p = 3.25E-14

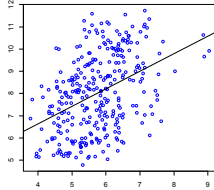

SMAD2  
R = 0.292309  
p = 1.84E-07

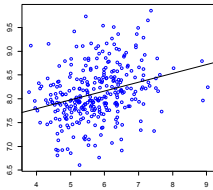

GSE37745

MAPK1  
R = 0.256068  
p = 0.000292

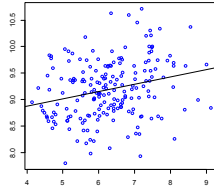

MAPKAP1  
R = 0.301675  
p = 1.73E-05

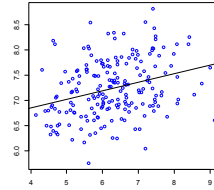

NCK1  
R = 0.206953  
p = 0.00361

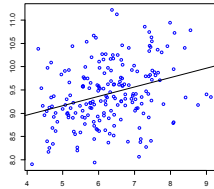

PDK1  
R = 0.167673  
p = 0.018821

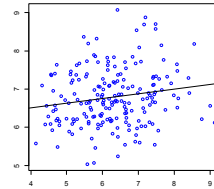

RAC1  
R = 0.352453  
p = 4.06E-07

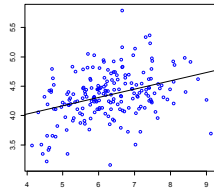

RIT1  
R = 0.411148  
p = 2.15E-09

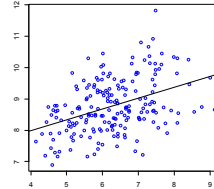

SLC2A1  
R = 0.267319  
p = 0.000152

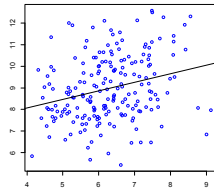

SMAD2  
R = 0.245994  
p = 0.00051

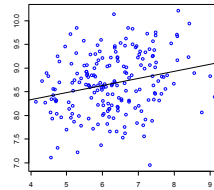

Supplementary Fig. S4. Continued.
